# Supplementary material for: Mucilaginibacter sp. Strain Metal(loid) and Antibiotic Resistance Isolated from Estuarine Soil Contaminated Mine Tailing from the Fundão Dam
Source: MDPI journal article supplement (doi:10.3390/genes13020174), 2022-01-19
Supplement: s1 [file s1]

## Supplementary data

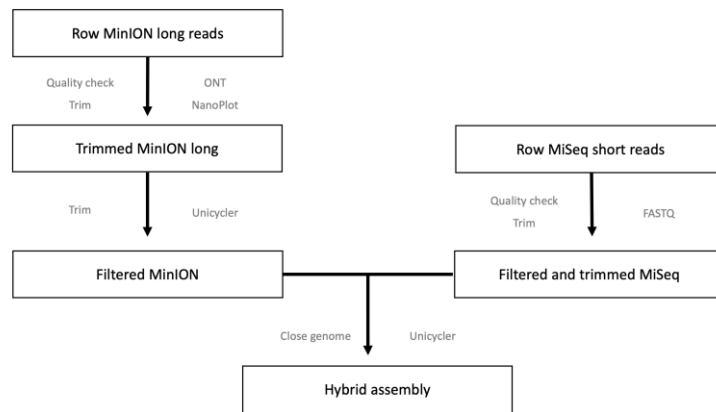

**Figure S1.** Bioinformatic workflow of the hybrid, MinION and MiSeq assembly.

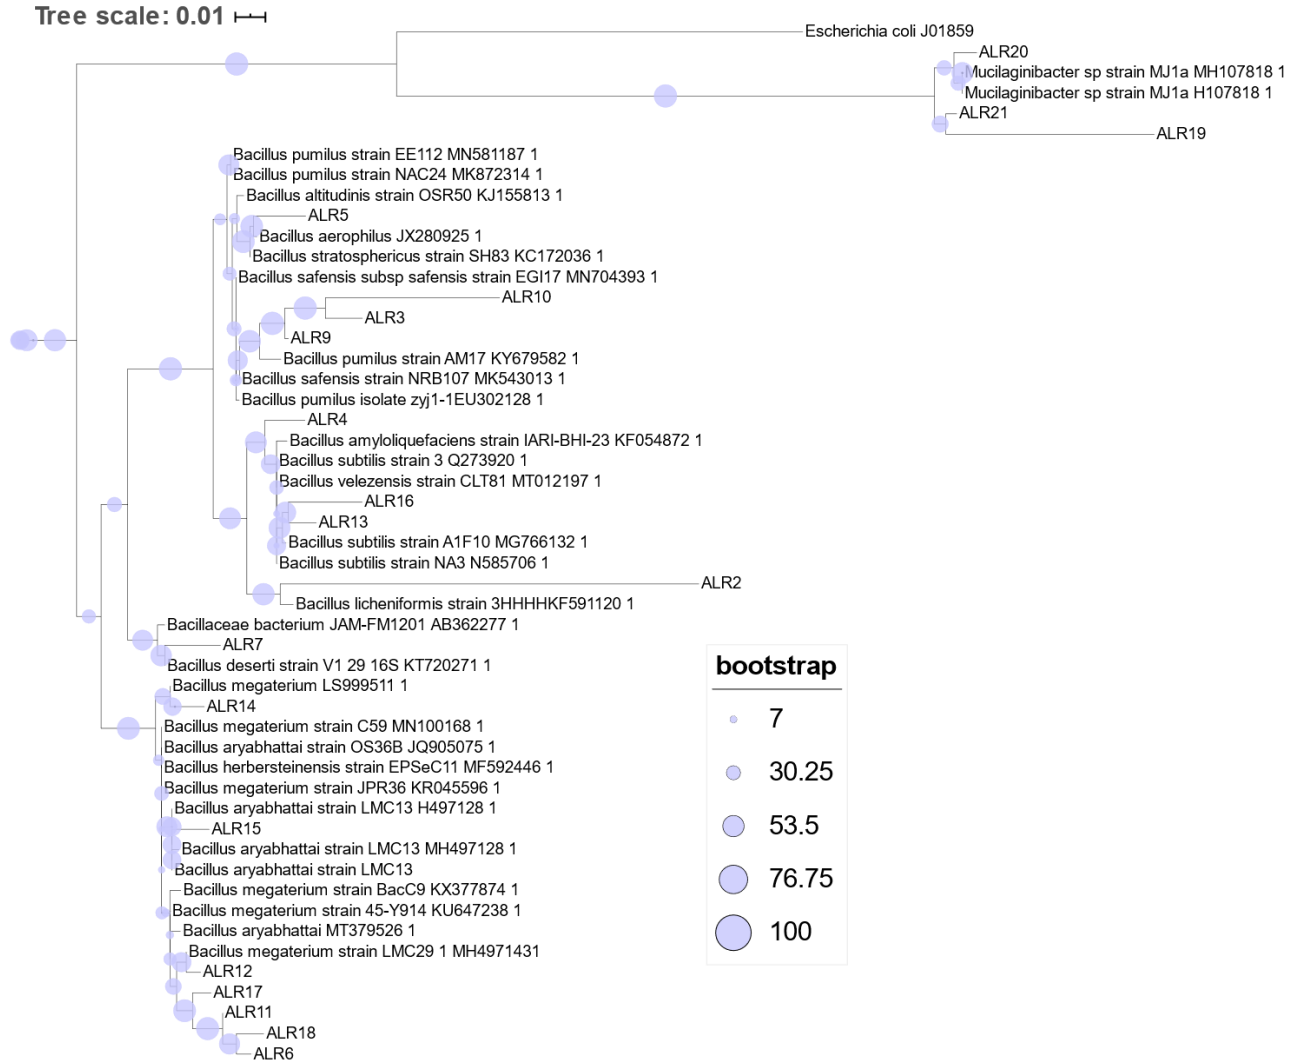

**Figure S2.** Neighbor-joining phylogenetic tree constructed based on the 16S ribosomal RNA (rRNA) gene sequences from bacteria isolated showing the phylogenetic relationships between all isolated strains including *Mucilaginibacter* sp. 21p. Values indicate percentages of identical branching in 100 bootstrapping. The sequence of *Escherichia coli* J01859 was used as an out-group.

**Table S1: Direct submission of sequence data to GenBank**

| Submission Number and Taxonomic |          |                                                     |
|---------------------------------|----------|-----------------------------------------------------|
| SUB8325601 ALR1                 | MW187503 | <i>Bacillus</i> sp.                                 |
| SUB8325601 ALR2                 | MW187504 | <i>Bacillus licheniformis</i>                       |
| SUB8325601 ALR3                 | MW187505 | <i>Bacillus pumilus</i>                             |
| SUB8325601 ALR4                 | MW187506 | <i>Bacillus</i> sp.                                 |
| SUB8325601 ALR5                 | MW187507 | <i>Bacillus aerophilus</i>                          |
| SUB8325601 ALR6                 | MW187508 | <i>Bacillus</i> sp.                                 |
| SUB8325601 ALR7                 | MW187509 | <i>Bacillus</i> sp.                                 |
| SUB8325601 ALR9                 | MW187510 | <i>Bacillus pumilus</i>                             |
| SUB8325601 ALR10                | MW187511 | <i>Bacillus pumilus</i>                             |
| SUB8325601 ALR11                | MW187512 | <i>Bacillus</i> sp.                                 |
| SUB8325601 ALR12                | MW187513 | <i>Bacillus megaterium</i>                          |
| SUB8325601 ALR13                | MW187514 | <i>Bacillus subtilis</i>                            |
| SUB8325601 ALR14                | MW187515 | <i>Bacillus megaterium</i>                          |
| SUB8325601 ALR15                | MW187516 | <i>Bacillus aryabhatai</i>                          |
| SUB8325601 ALR16                | MW187517 | <i>Bacillus subtilis</i>                            |
| SUB8325601 ALR17                | MW187518 | <i>Bacillus</i> sp.                                 |
| SUB8325601 ALR18                | MW187519 | <i>Bacillus</i> sp.                                 |
| SUB8325601 ALR19                | MW187520 | <i>Mucilaginibacter</i> sp.                         |
| SUB8325601 ALR20                | MW187521 | <i>Mucilaginibacter</i> sp.                         |
| SUB8325601 ALR21                | MW187522 | <i>Mucilaginibacter</i> sp.                         |
| <b>SUB8286515 PRJNA667924</b>   |          | <b>SAMN16392370 <i>Mucilaginibacter</i> sp. 21p</b> |

**Table S2.** Chemical Analysis of the soil where the strains were selected.

| Sample            | Total metal in mg kg <sup>-1</sup> |     |     |      |      |       |       |      |       |      |      |     |     |
|-------------------|------------------------------------|-----|-----|------|------|-------|-------|------|-------|------|------|-----|-----|
|                   | Al                                 | Cd  | Co  | Cr   | Cu   | Fe    | Mn    | Ni   | P     | Pb   | Zn   | pH  | Eh  |
| Contaminated soil | 7370                               | 3.1 | 8.8 | 30.3 | 10.7 | 30396 | 459.8 | 10.1 | 387.4 | 13.6 | 48.4 | 6.5 | 370 |
| Pristine Soil     | 1082                               | --  | 1.2 | 4,1  | 3.6  | 10489 | 50.0  | 2.3  | --    | 4.8  | 2.4  | --  | --  |

\* Data based on Gomes et al. 2017, study that collect samples 2 days before the disaster in the same that this study; Cd, pH and Eh was not informed.

**Table S3.** Average Nucleotide Identification (Blast algorithm).

|   | Nome                                    | ANiB [%] | Aligned [%] | Aligned [bp] | Total [bp] | RefSeq             |
|---|-----------------------------------------|----------|-------------|--------------|------------|--------------------|
| 1 | <i>Mucilaginibacter paludis</i>         | 69.38    | 36.33       | 1722017      | 4739655    | NZ_CM001403.1      |
| 2 | <i>Mucilaginibacter psychrotolerans</i> | 71.83    | 46.90       | 2222846      | 4739655    | NZ_SOZE000000000.1 |

|    |                                           |       |       |         |         |                      |
|----|-------------------------------------------|-------|-------|---------|---------|----------------------|
| 3  | <i>Mucilaginibacter phyllosphaerae</i>    | 73.76 | 51.95 | 2462155 | 4739655 | NZ_SNQG000000000.1;  |
| 4  | <i>Mucilaginibacter kameinonensis</i>     | 70.41 | 45.97 | 2178982 | 4739655 | NZ_RCWZ000000000.1;  |
| 5  | <i>Mucilaginibacter gotjawali</i>         | 69.80 | 38.06 | 1804141 | 4739655 | NZ_AP017313.1        |
| 6  | <i>Mucilaginibacter lappiensis</i>        | 70.50 | 44.25 | 2097240 | 4739655 | NZ_FTMG000000000.1;  |
| 7  | <i>Mucilaginibacter polytrichastri</i>    | 69.90 | 39.83 | 1887980 | 4739655 | NZ_FPAM000000000.1   |
| 8  | <i>Mucilaginibacter gossypii</i>          | 70.72 | 44.74 | 2120667 | 4739655 | NZ_CP043449.1        |
| 9  | <i>Mucilaginibacter hurinus</i>           | 70.08 | 32.92 | 1560174 | 4739655 | NZ_QGDC000000000.1   |
| 10 | <i>Mucilaginibacter corticis</i>          | 70.39 | 37.13 | 1759804 | 4739655 | NZ_VLPK000000000.1   |
| 11 | <i>Mucilaginibacter terrigena</i>         | 73.88 | 49.65 | 2353321 | 4739655 | NZ_SEWG000000000.1;  |
| 12 | <i>Mucilaginibacter limnophilus</i>       | 70.30 | 37.44 | 1774487 | 4739655 | NZ_SACK000000000.1   |
| 13 | <i>Mucilaginibacter endophyticus</i>      | 70.47 | 46.14 | 2186976 | 4739655 | NZ_QPCG000000000.1   |
| 14 | <i>Mucilaginibacter xinganensis</i>       | 70.21 | 39.86 | 1889277 | 4739655 | NZ_CP022743.1        |
| 15 | <i>Mucilaginibacter ginsenosidivorax</i>  | 70.59 | 43.98 | 2084666 | 4739655 | NZ_CP042437.1        |
| 16 | <i>Mucilaginibacter ginsenosidivorans</i> | 69.54 | 36.84 | 1746029 | 4739655 | NZ_CP042436.1        |
| 17 | <i>Mucilaginibacter frigoritolerans</i>   | 70.02 | 39.00 | 1848280 | 4739655 | NZ_VLLI000000000.1   |
| 18 | <i>Mucilaginibacter gracilis</i>          | 69.62 | 33.99 | 1611240 | 4739655 | NZ_RBKU000000000.1   |
| 19 | <i>Mucilaginibacter rubeus</i>            | 70.39 | 46.65 | 2211131 | 4739655 | NZ_CP043450.1        |
| 20 | <i>Mucilaginibacter oryzae</i>            | 70.70 | 43.84 | 2077853 | 4739655 | NZ_QGHA000000000.1   |
| 21 | <i>Mucilaginibacter yixingensis</i>       | 70.14 | 33.37 | 1581560 | 4739655 | NZ_QAOQ000000000.1   |
| 22 | <i>Mucilaginibacter auburnensis</i>       | 70.12 | 33.74 | 1599015 | 4739655 | NZ_PGFJ000000000.1   |
| 23 | <i>Mucilaginibacter pedocola</i>          | 71.96 | 49.97 | 2368607 | 4739655 | NZ_MBTf000000000.1   |
| 24 | <i>Mucilaginibacter gossypicola</i>       | 70.47 | 46.54 | 2205933 | 4739655 | NZ_FOCL000000000.1;  |
| 25 | <i>Mucilaginibacter mallensis</i>         | 70.20 | 38.57 | 1827886 | 4739655 | NZ_LT629740.1        |
| 26 | <i>Mucilaginibacter pineti</i>            | 70.66 | 44.07 | 2088850 | 4739655 | NZ_FNAI000000000.1   |
| 27 | <i>Mucilaginibacter boryungensis</i>      | 70.36 | 33.57 | 1639307 | 4882537 | NZ_JADFFM010000001.1 |
| 28 | <i>Mucilaginibacter glaciei</i>           | 69.84 | 35.18 | 1709210 | 4857968 | NZ_JACWMX000000000.1 |
| 29 | <i>Mucilaginibacter galii</i>             | 72.21 | 50.55 | 2322903 | 4595613 | NZ_BMDO01000018.1    |
| 30 | <i>Mucilaginibacter myungsuensis</i>      | 69.63 | 33.89 | 1723720 | 5086043 | NZ_JADFFL000000000.1 |
| 31 | <i>Mucilaginibacter pankratovii</i>       | 72.08 | 37.34 | 2378066 | 6368633 | NZ_JACWMY000000000.1 |
| 32 | <i>Mucilaginibacter rigui</i>             | 74.11 | 53.22 | 2506078 | 4708985 | NZ_JACWMW000000000.1 |

1

**Table S4.** List of alleles that is not present in assembly *M. 21p* e according to Pirate.

| Gene           | Description                                                                        | Frequency* |
|----------------|------------------------------------------------------------------------------------|------------|
| <i>chonabc</i> | Chondroitin sulfate ABC exolyase                                                   | 1          |
| <i>abnA</i>    | Extracellular endo- $\alpha$ -(1 $\rightarrow$ 5)-L-arabinanase 1                  | 1          |
| <i>nagAa</i>   | Naphthalene C2-salicylate 5-hydroxylase systems ferredoxin--NAD(P)(+)%2C reductase | 1          |
| <i>narX</i>    | Nitrate/nitrite sensor protein NarX                                                | 1          |
| <i>nap</i>     | putative carboxylesterase nap                                                      | 1          |
| <i>narS</i>    | putative sensor histidine kinase NarS                                              | 2          |
| <i>tnaA1</i>   | Tryptophanase 1                                                                    | 2          |
| <i>nasC</i>    | Assimilatory nitrate reductase catalytic subunit                                   | 2          |
| <i>phnA</i>    | Phosphonoacetate hydrolase                                                         | 2          |
| <i>xynA</i>    | Endo-1%2C4-beta-xylanase A                                                         | 2          |
| <i>nagJ</i>    | hypothetical protein                                                               | 4          |

|             |                                                |    |
|-------------|------------------------------------------------|----|
| <i>arnA</i> | Bifunctional polymyxin resistance protein ArnA | 6  |
| <i>nanR</i> | HTH-type transcriptional repressor NanR        | 6  |
| <i>nanM</i> | N-acetylneuraminate epimerase                  | 7  |
| <i>napA</i> | Periplasmic nitrate reductase                  | 15 |
| <i>nasD</i> | Nitrite reductase [NAD(P)H]                    | 16 |
| <i>nasF</i> | Uroporphyrinogen-III C-methyltransferase       | 18 |

---

\*Comparative analyze of frequency of each specie contain respective gene.
